# Supplementary material for: Using data from the 100,000 Genomes Project to resolve conflicting interpretations of a recurrent TUBB2A mutation
Source: HighWire-hosted journal article supplement (doi:10.1136/jmedgenet-2020-107528), 2021-02-05
Supplement: jmedgenet-2020-107528supp004_data_supplement.pdf [file jmedgenet-2020-107528supp004_data_supplement.pdf]

**Appendix: The Genomics England Research Consortium\***

Ambrose J. C.<sup>1</sup>, Arumugam P.<sup>1</sup>, Baple E. L.<sup>1</sup>, Bleda M.<sup>1</sup>, Boardman-Pretty F.<sup>1,2</sup>, Boissiere J. M.<sup>1</sup>, Boustred C. R.<sup>1</sup>, Brittain H.<sup>1</sup>, Caulfield M. J.<sup>1,2</sup>, Chan G. C.<sup>1</sup>, Craig C. E. H.<sup>1</sup>, Daugherty L.C.<sup>1</sup>, de Burca A.<sup>1</sup>, Devereau, A.<sup>1</sup>, Elgar G.<sup>1,2</sup>, Foulger R. E.<sup>1</sup>, Fowler T.<sup>1</sup>, Furió-Tarí P.<sup>1</sup>, Hackett J. M.<sup>1</sup>, Halai D.<sup>1</sup>, Hamblin A.<sup>1</sup>, Henderson S.<sup>1,2</sup>, Holman J. E.<sup>1</sup>, Hubbard T. J. P.<sup>1</sup>, Ibañez K.<sup>1,2</sup>, Jackson R.<sup>1</sup>, Jones L. J.<sup>1,2</sup>, Kasperaviciute D.<sup>1,2</sup>, Kayikci M.<sup>1</sup>, Kousathanas A.<sup>1</sup>, Lahnstein L.<sup>1</sup>, Lawson K.<sup>1</sup>, Leigh S. E. A.<sup>1</sup>, Leong I. U. S.<sup>1</sup>, Lopez F. J.<sup>1</sup>, Maleady-Crowe F.<sup>1</sup>, Mason J.<sup>1</sup>, McDonagh E.M.<sup>1,2</sup>, Moutsianas L.<sup>1,2</sup>, Mueller M.<sup>1,2</sup>, Murugaesu N.<sup>1</sup>, Need A. C.<sup>1,2</sup>, Odhams C. A.<sup>1</sup>, Patch C.<sup>1,2</sup>, Pereira M. B.<sup>1</sup>, Perez-Gil D.<sup>1</sup>, Polychronopoulos D.<sup>1</sup>, Pullinger J.<sup>1</sup>, Rahim T.<sup>1</sup>, Rendon A.<sup>1</sup>, Riesgo-Ferreiro P.<sup>1</sup>, Rogers T.<sup>1</sup>, Ryten M.<sup>1</sup>, Savage K.<sup>1</sup>, Sawant K.<sup>1</sup>, Scott R. H.<sup>1</sup>, Siddiq A.<sup>1</sup>, Sieghart A.<sup>1</sup>, Smedley D.<sup>1,2</sup>, Smith K. R.<sup>1,2</sup>, Smith S. C.<sup>1</sup>, Sosinsky A.<sup>1,2</sup>, Spooner W.<sup>1</sup>, Stevens H. E.<sup>1</sup>, Stuckey A.<sup>1</sup>, Sultana R.<sup>1</sup>, Thomas E. R. A.<sup>1,2</sup>, Thompson S. R.<sup>1</sup>, Tregidgo C.<sup>1</sup>, Tucci A.<sup>1,2</sup>, Walsh E.<sup>1</sup>, Watters, S. A.<sup>1</sup>, Welland M. J.<sup>1</sup>, Williams E.<sup>1</sup>, Witkowska K.<sup>1,2</sup>, Wood S. M.<sup>1,2</sup>, Zarowiecki M.<sup>1</sup>

1. Genomics England, London, UK. 2. William Harvey Research Institute, Queen Mary University of London, London, EC1M 6BQ, UK
